# Supplementary material for: The rs1256328 (ALPL) and rs12654812 (RGS14) Polymorphisms are Associated with Susceptibility to Calcium Nephrolithiasis in a Taiwanese population
Source: PubMed Central journal article supplement (PMC6872875; doi:10.1038/s41598-019-53261-8), 2019-11-21
Supplement: 41598_2019_53261_MOESM1_ESM.pdf [file 41598_2019_53261_MOESM1_ESM.pdf]

## Supplementary Information for

**The rs1256328 (*ALPL*) and rs12654812 (*RGS14*) Polymorphisms Are Associated with Susceptibility to Calcium Nephrolithiasis in a Taiwanese population**

**Wei-Chiao Chen<sup>1,2+</sup>, Wan-Hsuan Chou<sup>3+</sup>, Hou-Wei Chu<sup>4</sup>, Chi-Chen Huang<sup>5</sup>, Xiao Liu<sup>6</sup>, Wei-Pin Chang<sup>7\*</sup>, Yii-Her Chou<sup>2\*</sup>, Wei-Chiao Chang<sup>3,6,8\*</sup>**

<sup>1</sup>Institute of Clinical Pharmacy and Pharmaceutical Sciences, College of Medicine, National Cheng Kung University, Tainan, Taiwan

<sup>2</sup>Department of Urology, Kaohsiung Medical University Hospital, Kaohsiung, Taiwan

<sup>3</sup>Department of Clinical Pharmacy, School of Pharmacy, Taipei Medical University, Taipei, Taiwan

<sup>4</sup>Institute of Biomedical Sciences, Academia Sinica, Taipei, Taiwan

<sup>5</sup>Graduate Institute of Neural Regenerative Medicine, College of Medical Science and Technology/Center for Neurotrauma and Neuroregeneration, Taipei Medical University, Taipei, 115, Taiwan

<sup>6</sup>Department of Medicine, The University of Chicago, Chicago, USA

<sup>7</sup>School of Health Care Administration, College of Management, Taipei Medical University, Taipei, Taiwan

<sup>8</sup>Master Program for Clinical Pharmacogenomics and Pharmacoproteomics, School of Pharmacy, Taipei Medical University, Taipei, Taiwan

+ Wei-Chiao Chen and Wan-Hsuan Chou contributed equally to this work.

\* Corresponding authors:

Wei-Chiao Chang ([wcc@tmu.edu.tw](mailto:wcc@tmu.edu.tw)); Yii-Her Chou ([yihech@gap.kmu.edu.tw](mailto:yihech@gap.kmu.edu.tw)); Wei-Pin Chang ([wpchang@tmu.edu.tw](mailto:wpchang@tmu.edu.tw))

This file includes

Fig. S1 to S2

Table S1 to S3

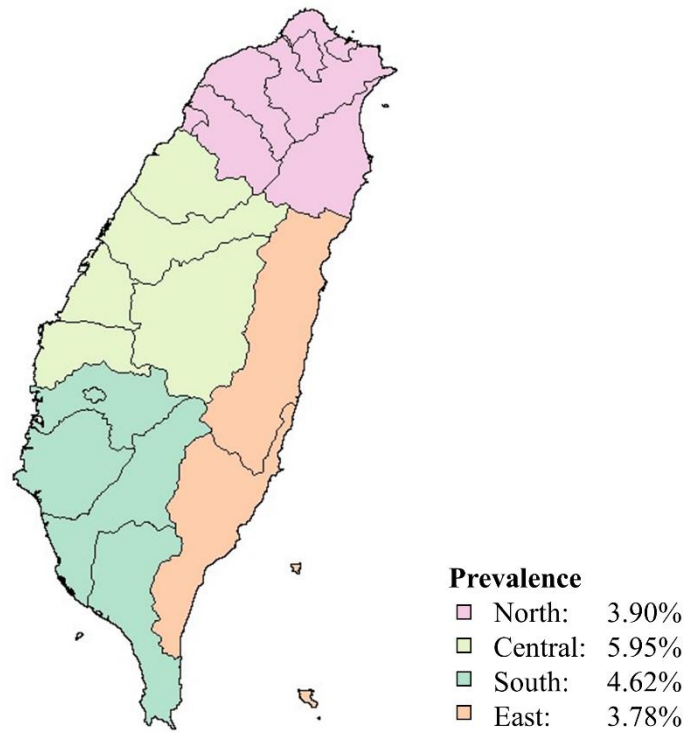

**Fig. S1.** Regional prevalence of nephrolithiasis in Taiwan

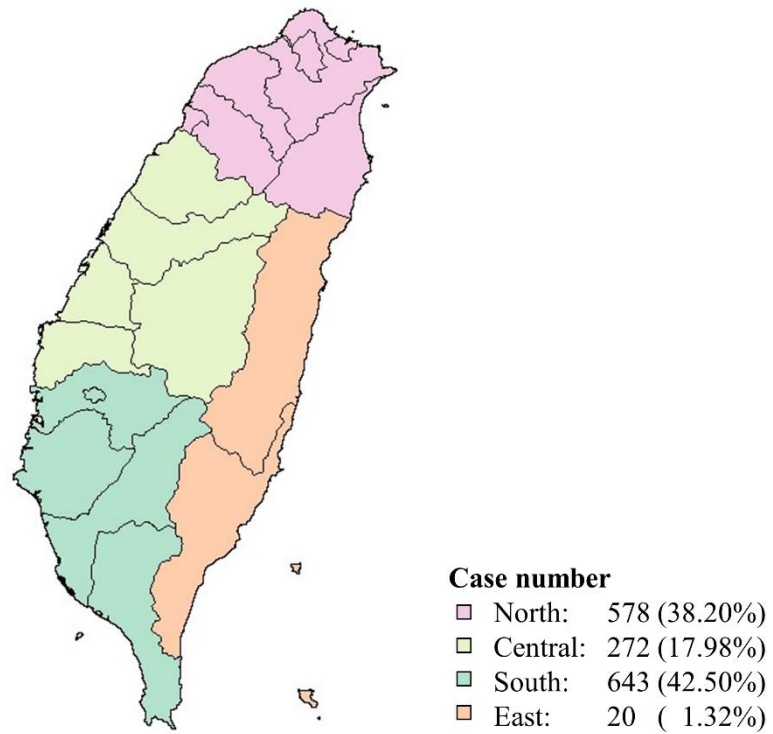

**Fig. S2.** Distribution of the subjects from Taiwan Biobank

**Table S1. Comparisons of genotype and allele distributions between nephrolithiasis patients and controls.**

| SNP                        | Genotype | Genotype Frequencies |                      | <i>P</i> value | Allele | Allele Frequencies |                      | <i>P</i> value |
|----------------------------|----------|----------------------|----------------------|----------------|--------|--------------------|----------------------|----------------|
|                            |          | Case (%)             | TWB <sup>a</sup> (%) |                |        | Case (%)           | TWB <sup>a</sup> (%) |                |
| <i>ALPL</i><br>rs1256328   | TT       | 33 (7.5)             | 58 (3.9)             | <b>0.0005</b>  | T      | 180 (20.5)         | 609 (20.2)           | 0.8313         |
|                            | CT       | 114 (26.0)           | 493 (32.7)           |                | C      | 696 (79.5)         | 2403 (79.8)          |                |
|                            | CC       | 291 (66.5)           | 955 (63.4)           |                |        |                    |                      |                |
| <i>CASR</i><br>rs7627468   | GG       | 97 (22.8)            | 346 (23.2)           | 0.0613         | G      | 379 (44.5)         | 1419 (47.5)          | 0.1170         |
|                            | AG       | 185 (43.4)           | 727 (48.7)           |                | A      | 473 (55.5)         | 1567 (52.5)          |                |
|                            | AA       | 144 (33.8)           | 420 (28.1)           |                |        |                    |                      |                |
| <i>RGS14</i><br>rs12654812 | AA       | 39 (8.6)             | 68 (4.9)             | <b>0.0072</b>  | A      | 238 (27.2)         | 659 (23.7)           | 0.0346         |
|                            | AG       | 160 (37.1)           | 523 (37.6)           |                | G      | 636 (72.8)         | 2121 (76.3)          |                |
|                            | GG       | 238 (54.3)           | 799 (57.5)           |                |        |                    |                      |                |

<sup>a</sup>General population from Taiwan Biobank. *P* values which remain significant after performing Bonferroni correction ( $p \leq 0.016$ ) are shown in bold.

**Table S2. Association analysis between SNPs and stone frequency and stone numbers in patients with kidney stone.**

| Variant      | Genotype | Multiple Stones (%) |            | <i>P</i> -value | Recurrence (%) |                | <i>P</i> -value |
|--------------|----------|---------------------|------------|-----------------|----------------|----------------|-----------------|
|              |          | Multiple            | Single     |                 | Recurrence     | Non-recurrence |                 |
| <i>ALPL</i>  | TT       | 13 (6.1)            | 17 (8.6)   | 0.9533          | 13 (7.3)       | 14 (6.3)       | 0.7281          |
| rs1256328    | CT       | 63 (29.4)           | 47 (23.9)  |                 | 44 (24.6)      | 64 (28.8)      |                 |
|              | CC       | 138 (64.5)          | 133 (67.5) |                 | 122 (68.1)     | 144 (64.9)     |                 |
| <i>CASR</i>  | GG       | 43 (20.6)           | 48 (25.3)  | 0.1050          | 40 (23.1)      | 47 (21.8)      | 0.9833          |
| rs7627468    | AG       | 89 (42.6)           | 83 (43.7)  |                 | 73 (42.2)      | 96 (44.4)      |                 |
|              | AA       | 77 (36.8)           | 59 (31.0)  |                 | 60 (34.7)      | 73 (33.8)      |                 |
| <i>RGS14</i> | AA       | 24 (11.3)           | 12 (6.1)   | 0.1736          | 19 (10.6)      | 18 (8.1)       | 0.9405          |
| rs12654812   | AG       | 76 (35.7)           | 74 (37.6)  |                 | 59 (33.0)      | 86 (38.9)      |                 |
|              | GG       | 113 (53.0)          | 111 (56.3) |                 | 101 (56.4)     | 117 (53.0)     |                 |

The *P* value was adjusted for sex and age. *P* values which remain significant after performing Bonferroni correction ( $p \leq 0.016$ ) are shown in bold.

**Table S3. Association analysis between SNPs and CGGFR/MDRD-S in patients with kidney stone**

| SNP                        | Genotype | MDRDs<br>(ml/min/1.73 m <sup>2</sup> ) | <i>P</i> -value | CGGFR<br>(ml/min) | <i>P</i> -value |
|----------------------------|----------|----------------------------------------|-----------------|-------------------|-----------------|
| <i>ALPL</i><br>rs1256328   | TT       | 71.92 ± 31.00                          | 0.1704          | 82.23 ± 25.78     | 0.7298          |
|                            | CT       | 82.63 ± 27.10                          |                 | 87.28 ± 26.15     |                 |
|                            | CC       | 80.21 ± 28.98                          |                 | 84.27 ± 30.39     |                 |
| <i>CASR</i><br>rs7627468   | GG       | 82.87 ± 27.70                          | 0.3126          | 84.92 ± 32.59     | 0.3628          |
|                            | AG       | 81.25 ± 27.32                          |                 | 88.37 ± 24.78     |                 |
|                            | AA       | 77.49 ± 31.45                          |                 | 82.02 ± 30.86     |                 |
| <i>RGS14</i><br>rs12654812 | AA       | 76.30 ± 29.42                          | 0.6629          | 77.54 ± 21.87     | 0.1919          |
|                            | AG       | 80.03 ± 26.15                          |                 | 88.86 ± 28.03     |                 |
|                            | GG       | 80.87 ± 30.27                          |                 | 83.58 ± 30.42     |                 |

The *P* value was adjusted for sex and age. *P* values which remain significant after performing Bonferroni correction ( $p \leq 0.016$ ) are shown in bold.
